# Supplementary material for: Mutations in Glycosyltransferases and Glycosidases: Implications for Associated Diseases
Source: MDPI journal article supplement (doi:10.3390/biom14040497), 2024-04-19
Supplement: s1 [file s1]

**Supplementary Table S1.** Statistics and Mann-Whitney Test Results of the Selected 20 Proteins

| Gene Symbol   | p-value of ACC | Median ACC (benign) (Å) | Median ACC (pathogenic) (Å) | p-value of average distance to active sites | Median average distance to active sites (benign) (Å) | Median average distance to active sites (pathogenic) (Å) | p-value of scaled deformation NMA | Median scaled deformation NMA (benign) (Å <sup>2</sup> ) | Median scaled deformation NMA (pathogenic) (Å <sup>2</sup> ) | p-value of scaled fluctuation NMA | Median scaled fluctuation NMA (benign) (Å <sup>2</sup> ) | Median scaled fluctuation NMA (pathogenic) (Å <sup>2</sup> ) |
|---------------|----------------|-------------------------|-----------------------------|---------------------------------------------|------------------------------------------------------|----------------------------------------------------------|-----------------------------------|----------------------------------------------------------|--------------------------------------------------------------|-----------------------------------|----------------------------------------------------------|--------------------------------------------------------------|
| <b>SI</b>     | 1              | 0                       |                             | 1                                           | 33.2330874                                           |                                                          | 1                                 | 0.16626622                                               |                                                              | 1                                 | 0.03070661                                               |                                                              |
| <b>GBA1</b>   | 1              |                         | 7                           | 1                                           |                                                      | 24.1196872                                               | 1                                 |                                                          | 0.04883343                                                   | 1                                 |                                                          | 0.01371153                                                   |
| <b>GLB1</b>   | 0.01405012     | 67                      | 2.5                         | 0.0969074                                   | 41.8651792                                           | 22.0194334                                               | 0.74710965                        | 0.09583243                                               | 0.08088924                                                   | 0.06415254                        | 0.21747094                                               | 0.05739601                                                   |
| <b>NAGLU</b>  | 0.0028002      | 59.5                    | 1                           | 1                                           |                                                      |                                                          | 0.03375535                        | 0.07206584                                               | 0.16742848                                                   | 0.26487295                        | 0.05966263                                               | 0.02404392                                                   |
| <b>MAN2B1</b> | 0.91425199     | 0.5                     | 1                           | 0.036834                                    | 23.3790599                                           | 17.077541                                                | 0.20542404                        | 0.00038162                                               | 0.00093061                                                   | 0.35547624                        | 0.00016475                                               | 0.00012428                                                   |
| <b>PYGM</b>   | 0.95423229     | 8.5                     | 3                           | 1                                           |                                                      |                                                          | 0.35042017                        | 0.00025629                                               | 7.96E-05                                                     | 0.5487395                         | 0.00010622                                               | 6.00E-05                                                     |
| <b>EXT1</b>   | 0.01976634     | 35                      | 6                           | 0.00230668                                  | 22.9779392                                           | 48.8908816                                               | 0.04386739                        | 0.06131663                                               | 0.15313596                                                   | 0.00508127                        | 0.18382015                                               | 0.05781039                                                   |
| <b>GBE1</b>   | 0.86970755     | 5.5                     | 7                           | 0.49225774                                  | 25.6974403                                           | 24.090489                                                | 0.63536464                        | 0.19428173                                               | 0.15365389                                                   | 0.87487512                        | 0.07358066                                               | 0.08078677                                                   |
| <b>HEXB</b>   | 0.00515242     | 35                      | 0                           | 0.25364761                                  | 38.0654979                                           | 22.0809535                                               | 0.32981798                        | 0.06635532                                               | 0.06459283                                                   | 0.80213829                        | 0.01257666                                               | 0.01226056                                                   |
| <b>HEXA</b>   | 0.02790553     | 62                      | 22                          | 0.12875992                                  | 27.9194211                                           | 23.2013117                                               | 0.16546543                        | 0.25397702                                               | 0.08124286                                                   | 0.84294197                        | 0.04611765                                               | 0.07014505                                                   |
| <b>GAA</b>    | 2.36E-05       | 26.5                    | 0                           | 3.26E-05                                    | 37.5013096                                           | 19.0740277                                               | 0.49468364                        | 0.1499508                                                | 0.12943835                                                   | 0.00406719                        | 0.06628381                                               | 0.0199118                                                    |
| <b>ALG1</b>   | 0.00283157     | 70                      | 4.5                         | 1                                           |                                                      |                                                          | 0.90252325                        | 0.04207852                                               | 0.0365597                                                    | 0.01011233                        | 0.00434431                                               | 0.00145264                                                   |
| <b>GNE</b>    | 1              |                         | 8                           | 1                                           |                                                      | 29.4781716                                               | 1                                 |                                                          | 0.03612294                                                   | 1                                 |                                                          | 0.10245581                                                   |
| <b>GLA</b>    | 0.2526706      | 22                      | 1                           | 0.14529513                                  | 26.7747974                                           | 18.415886                                                | 0.0696695                         | 0.47566919                                               | 0.22822138                                                   | 0.15248676                        | 0.09051871                                               | 0.06228933                                                   |
| <b>IDUA</b>   | 8.02E-05       | 19                      | 3                           | 0.07549415                                  | 31.893904                                            | 24.5852097                                               | 0.07822682                        | 0.04731944                                               | 0.07056749                                                   | 0.01714489                        | 0.08519461                                               | 0.03307478                                                   |
| <b>GALC</b>   | 0.19080416     | 7.5                     | 0                           | 0.03280016                                  | 26.2699689                                           | 20.3383872                                               | 0.61626669                        | 0.00478889                                               | 0.00333613                                                   | 0.03820479                        | 0.00070461                                               | 0.00036349                                                   |
| <b>MUTYH</b>  | 1              |                         | 55                          | 1                                           |                                                      | 28.2525905                                               | 1                                 |                                                          | 0.00198133                                                   | 1                                 |                                                          | 8.66E-05                                                     |
| <b>AGL</b>    | 1              | 39                      | 4                           | 0.67865468                                  | 40.968046                                            | 40.2261682                                               | 0.20646021                        | 0.09857838                                               | 0.0488599                                                    | 0.12920413                        | 0.0310125                                                | 0.00750066                                                   |
| <b>PIGA</b>   | 0.024955       | 71                      | 0                           | 1                                           |                                                      |                                                          | 0.05613416                        | 0.03834675                                               | 0.00123892                                                   | 0.01554938                        | 0.00293633                                               | 0.0007                                                       |
| <b>ALG13</b>  | 0.0505155      | 118                     | 36.5                        | 0.21512605                                  | 56.2035743                                           | 33.3303884                                               | 0.01344538                        | 0.01834732                                               | 0.00218482                                                   | 0.24201681                        | 0.00319483                                               | 0.00088994                                                   |

**Supplementary Table S1.** (Continue)

| <b>Gene Symbol</b> | <b>p-value of r4s</b> | <b>Median r4s (benign)</b> | <b>median_r4s (pathogenic)</b> | <b>p-value of mcsm</b> | <b>Median mcsm (benign)</b> | <b>Median mcsm (pathogenic)</b> |
|--------------------|-----------------------|----------------------------|--------------------------------|------------------------|-----------------------------|---------------------------------|
| <b>SI</b>          | 1                     | 1.3231                     | 0.0425                         | 1                      | -0.99                       | -0.079                          |
| <b>GBA1</b>        | 0.01800997            | 1.5869                     | 0.8573                         | 0.03749412             | -0.453                      | -0.996                          |
| <b>GLB1</b>        | 0.00449746            | 2.3393                     | 0.6948                         | 0.06488038             | -0.531                      | -1.367                          |
| <b>NAGLU</b>       | 0.36561186            | 1.20285                    | 0.765                          | 0.0008403              | -0.1955                     | -1.3765                         |
| <b>MAN2B1</b>      | 0.036834              | 1.07995                    | 0.4347                         | 0.91841029             | -1.1965                     | -1.2225                         |
| <b>PYGM</b>        | 0.40396096            | 1.38345                    | 0.7975                         | 0.45461826             | -0.3475                     | -0.5945                         |
| <b>EXT1</b>        | 0.00053873            | 1.6492                     | 0.62415                        | 0.00621024             | -0.42                       | -0.817                          |
| <b>GBE1</b>        | 0.04987602            | 1.561                      | 0.6297                         | 0.04767292             | -1.14                       | -0.1455                         |
| <b>HEXB</b>        | 0.00346185            | 1.8038                     | 0.3797                         | 0.28239726             | -0.914                      | -1.195                          |
| <b>HEXA</b>        | 0.20193807            | 2.8168                     | 1.37465                        | 0.28079613             | -1.208                      | -0.425                          |
| <b>GAA</b>         | 2.73E-06              | 2.33175                    | 0.5158                         | 0.00044443             | -0.3955                     | -1.165                          |
| <b>ALG1</b>        | 0.00052024            | 2.7144                     | 0.62415                        | 0.23644472             | -0.488                      | -0.619                          |
| <b>GNE</b>         | 1                     |                            | 0.43665                        | 1                      |                             | -1.742                          |
| <b>GLA</b>         | 0.00041587            | 3.5938                     | 0.8409                         | 0.68531321             | -1.192                      | -1.067                          |
| <b>IDUA</b>        | 3.04E-05              | 2.5273                     | 0.32515                        | 0.3791618              | -0.726                      | -0.887                          |
| <b>GALC</b>        | 0.00170792            | 1.4198                     | 0.7962                         | 0.98524972             | -0.9665                     | -1.036                          |
| <b>MUTYH</b>       | 1                     |                            | 2.3243                         | 1                      |                             | -1.411                          |
| <b>AGL</b>         | 0.25441225            | 1.5301                     | 0.9115                         | 0.95304695             | -0.9035                     | -0.908                          |
| <b>PIGA</b>        | 0.00042689            | 3.1956                     | 0.6025                         | 0.09904558             | -0.399                      | -1.839                          |
| <b>ALG13</b>       | 0.16470588            | 1.6448                     | 0.9939                         | 0.02016807             | -0.373                      | -1.566                          |

\* At least 2 data points from each group are required for the Mann-Whitney test. If the available data are not sufficient, the p-value is set to 1, indicating that there is no significance between the benign and pathogenic variant groups.
